# Supplementary material for: The SKPO-1 Peroxidase Functions in the Hypodermis to ProtectCaenorhabditis elegansFrom Bacterial Infection
Source: Oxford University Press journal article supplement (doi:10.1534/genetics.113.160606), 2014-03-13
Supplement: genetics.113.160606-1.pdf [file genetics.113.160606-1.pdf]

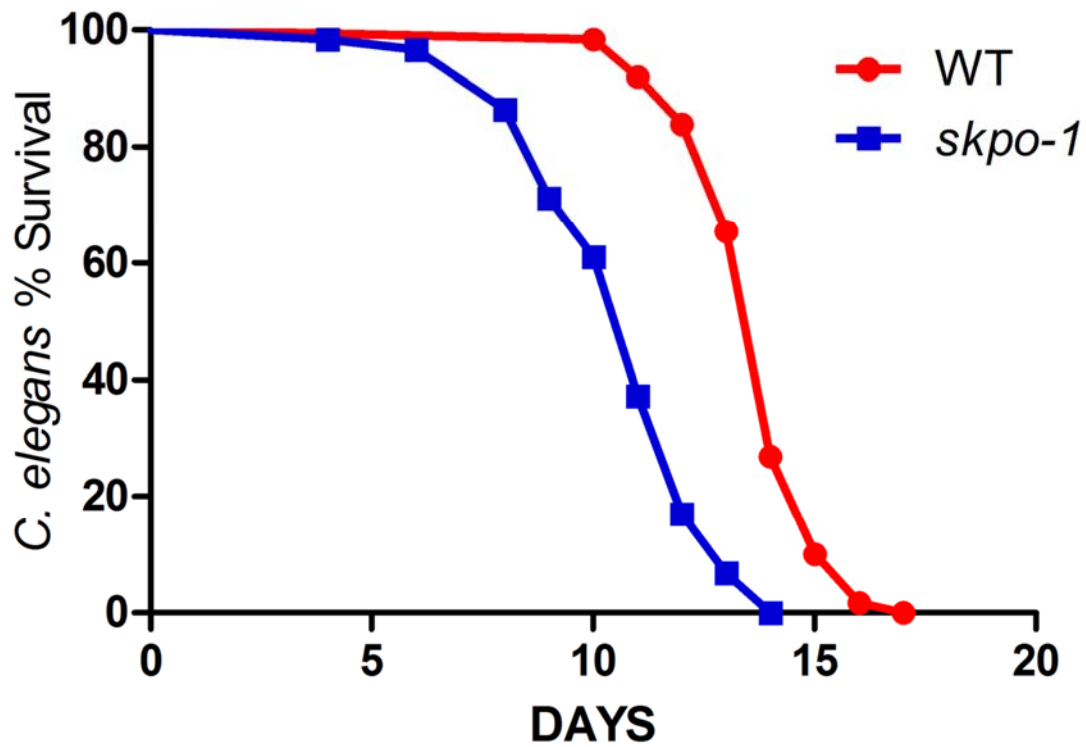

**Figure S2** Lifespan defect of *skpo-1* mutants on *E. coli* OP50 without prior *cdc-25.1* exposure. Wild type and *skpo-1* worms were grown on *E. coli* OP50 from L1 through L4 larval stage prior to the longevity assay in which they were transferred to NGM plates with FUDR (100  $\mu$ g/ml) seeded with concentrated (20X) *E. coli* OP50. The average lifespan of the *skpo-1* worms was significantly shorter than their wild type, counterparts ( $P$ -value < 0.0001).
