# Supplementary material for: The SKPO-1 Peroxidase Functions in the Hypodermis to ProtectCaenorhabditis elegansFrom Bacterial Infection
Source: Oxford University Press journal article supplement (doi:10.1534/genetics.113.160606), 2014-03-13
Supplement: genetics.113.160606-2.pdf [file genetics.113.160606-2.pdf]

**Table S2 Median survival and P-values of *E. coli* OP50 longevity assays**

| Figure number | Experiment number | Strain, exposure conditions during development | Median survival (Days) | P-value |
|---------------|-------------------|------------------------------------------------|------------------------|---------|
| 1B            | 1                 | <i>eri-1</i> , VC RNAi                         | 10                     | C       |
|               |                   | <i>eri-1, skpo-1</i> RNAi                      | 10                     | =0.3772 |
|               | 2                 | <i>eri-1</i> , VC RNAi                         | 10                     | C       |
|               |                   | <i>eri-1, skpo-1</i> RNAi                      | 10                     | =0.8948 |
| 1D            | 1                 | wild type, <i>cdc-25.1</i> RNAi                | 10                     | C       |
|               |                   | <i>skpo-1, cdc-25.1</i> RNAi                   | 8                      | <0.0001 |
|               | 2                 | wild type, <i>cdc-25.1</i> RNAi                | 14                     | C       |
|               |                   | <i>skpo-1, cdc-25.1</i> RNAi                   | 11                     | <0.0001 |
|               | 3                 | wild type, <i>cdc-25.1</i> RNAi                | 14                     | C       |
|               |                   | <i>skpo-1, cdc-25.1</i> RNAi                   | 11                     | <0.0001 |
| 4B            | 1                 | <i>vha-6</i> , VC RNAi                         | 10                     | C       |
|               |                   | <i>vha-6, skpo-1</i> RNAi                      | 10                     | =0.9997 |
|               | 2                 | <i>vha-6</i> , VC RNAi                         | 11                     | C       |
|               |                   | <i>vha-6, skpo-1</i> RNAi                      | 10                     | =0.4484 |
| 4D            | 1                 | <i>wrt-2</i> , VC RNAi                         | 11                     | C       |
|               |                   | <i>wrt-2, skpo-1</i> RNAi                      | 11                     | =0.6379 |
|               | 2                 | <i>wrt-2</i> , VC RNAi                         | 11                     | C       |
|               |                   | <i>wrt-2, skpo-1</i> RNAi                      | 11                     | =0.7235 |
| S2            | 1                 | wild type, OP50                                | 14                     | C       |
|               |                   | <i>skpo-1</i> , OP50                           | 11                     | <0.0001 |
|               | 2                 | wild type, OP50                                | 14                     | C       |
|               |                   | <i>skpo-1</i> , OP50                           | 11                     | <0.0001 |
| S3*           | 1                 | N2, <i>cdc-25.1</i> RNAi*                      | 16                     | C       |
|               |                   | <i>skpo-1, cdc-25.1</i> RNAi*                  | 13                     | <0.0001 |
|               | 2                 | N2, <i>cdc-25.1</i> RNAi*                      | 14                     | C       |
|               |                   | <i>skpo-1, cdc-25.1</i> RNAi*                  | 12                     | <0.0001 |

C = control, \*Assayed on heat-killed OP50
