# Supplementary material for: The SKPO-1 Peroxidase Functions in the Hypodermis to ProtectCaenorhabditis elegansFrom Bacterial Infection
Source: Oxford University Press journal article supplement (doi:10.1534/genetics.113.160606), 2014-03-13
Supplement: genetics.113.160606-3.pdf [file genetics.113.160606-3.pdf]

**Table S4 Median survival and P-values of *P. aeruginosa* PA14 killing assays**

| Figure Number | Experiment number | Strain, exposure conditions during development | Median survival (Hours) | P-value |
|---------------|-------------------|------------------------------------------------|-------------------------|---------|
| 1E            | 1                 | N2, <i>cdc-25.1</i> RNAi                       | 91                      | C       |
|               |                   | <i>skpo-1</i> , <i>cdc-25.1</i> RNAi           | 88                      | =0.3783 |
|               | 2                 | N2, <i>cdc-25.1</i> RNAi                       | 89                      | C       |
|               |                   | <i>skpo-1</i> , <i>cdc-25.1</i> RNAi           | 69                      | =0.0639 |
|               | 3                 | N2, <i>cdc-25.1</i> RNAi                       | 72                      | C       |
|               |                   | <i>skpo-1</i> , <i>cdc-25.1</i> RNAi           | 72                      | =0.2613 |
