# Supplementary material for: The SKPO-1 Peroxidase Functions in the Hypodermis to ProtectCaenorhabditis elegansFrom Bacterial Infection
Source: Oxford University Press journal article supplement (doi:10.1534/genetics.113.160606), 2014-03-13
Supplement: genetics.113.160606-5.pdf [file genetics.113.160606-5.pdf]

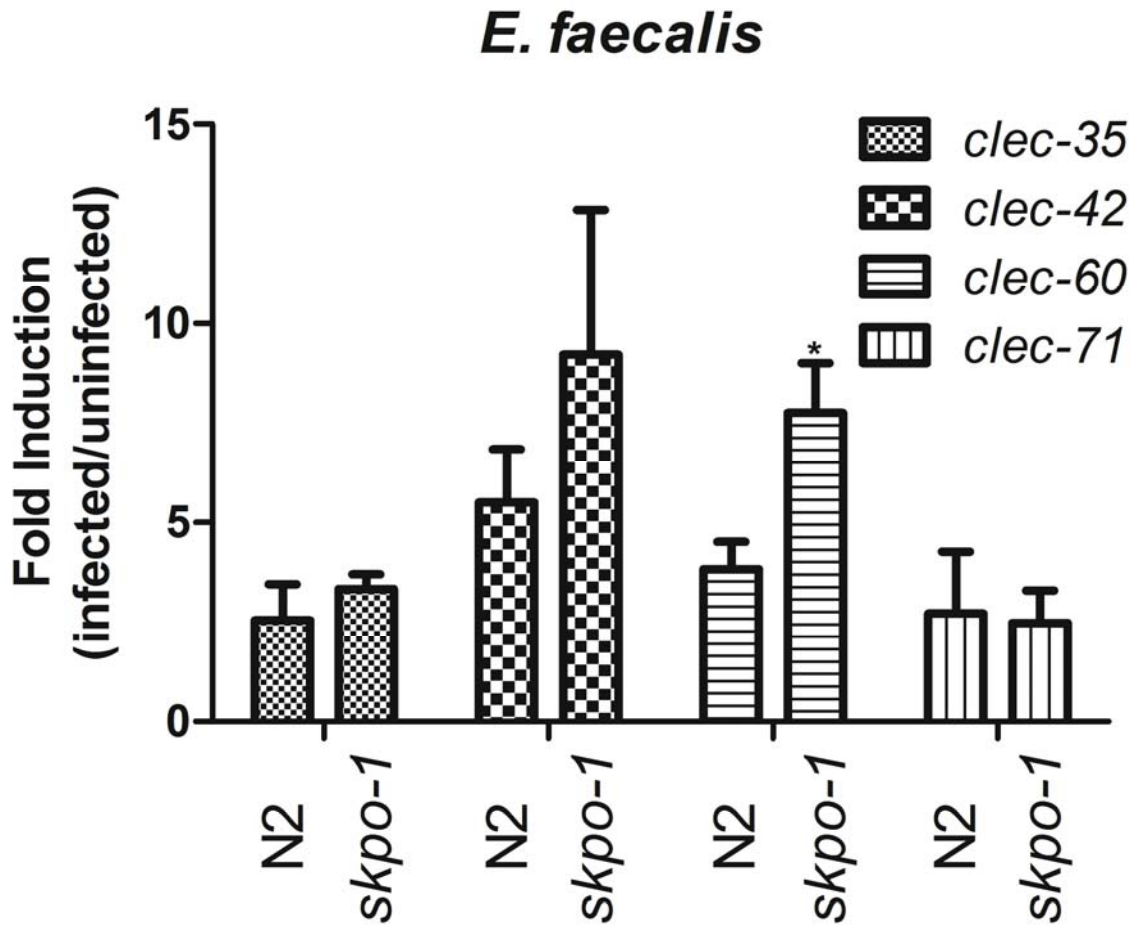

**Figure S5** *clec-60* expression is elevated in *skpo-1* mutant animals, relative to wild type, in response to *E. faecalis* infection. L4 wild type and *skpo-1* mutant animals were exposed to *E. faecalis* for 18 hours at 25° C. Three technical replicates per strain per gene were assayed for relative expression of innate immune response genes and the experiment was repeated, independently, twice. These genes were previously found to display increased expression in wild type animals in response to *E. faecalis* (ENGELMANN *et al.* 2011). Of the genes surveyed, *clec-60* was the only gene to display a significant increase in expression during infection, relative to *act-1*. *P*-values were 0.1912, 0.1768, 0.04432, and 0.4684 for *clec-35*, 42, 60 and 71, respectively.
