# Supplementary material for: The SKPO-1 Peroxidase Functions in the Hypodermis to ProtectCaenorhabditis elegansFrom Bacterial Infection
Source: Oxford University Press journal article supplement (doi:10.1534/genetics.113.160606), 2014-03-13
Supplement: genetics.113.160606-6.pdf [file genetics.113.160606-6.pdf]

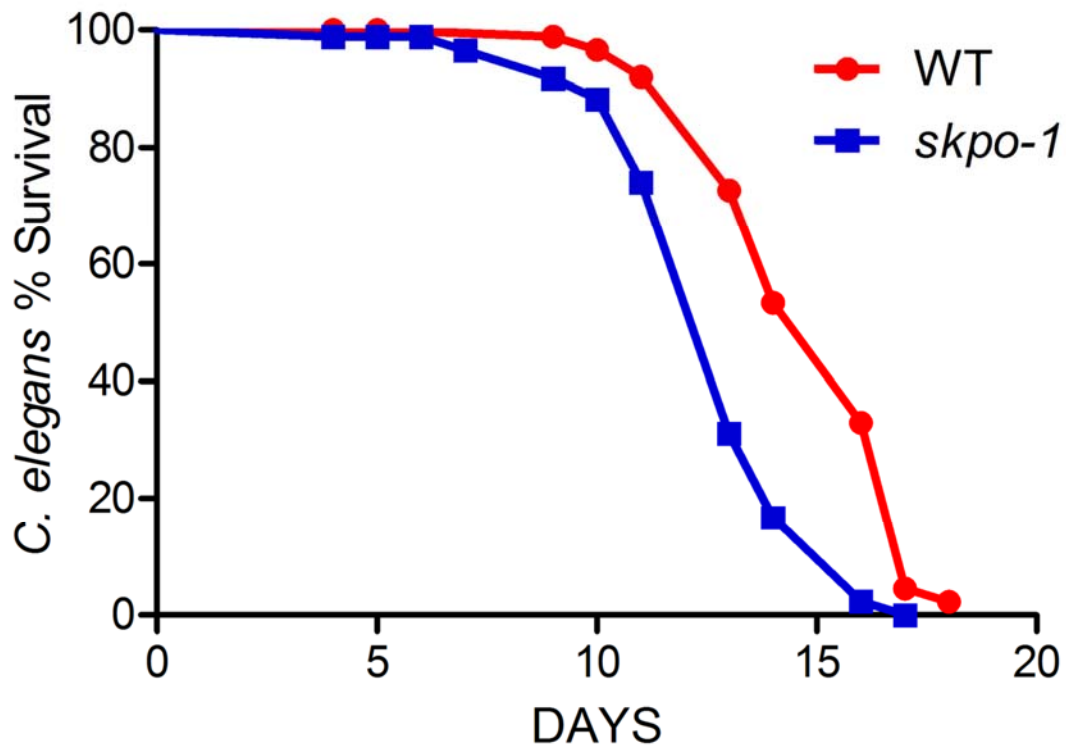

**Figure S3** *skpo-1* mutants display a lifespan defect on heat-killed *E. coli* OP50. Wild type and *skpo-1* worms were grown on *cdc-25.1* dsRNA expressing *E. coli* HT115 from L1 through L4 larval stage prior to the longevity assay. The worms were transferred to NGM plates like in Figure S2; however, the *E. coli* OP50 had been heat-killed. We observed that the *skpo-1* worms displayed a longevity defect on heat-killed OP50, relative to wild type worms ( $P$ -value  $< 0.0001$ ).
