# Supplementary material for: The SKPO-1 Peroxidase Functions in the Hypodermis to ProtectCaenorhabditis elegansFrom Bacterial Infection
Source: Oxford University Press journal article supplement (doi:10.1534/genetics.113.160606), 2014-03-13
Supplement: genetics.113.160606-7.pdf [file genetics.113.160606-7.pdf]

**Table S5 Primers for cDNA inserts ligated into pL4440 construct for dsRNA production in *E. coli***

| Oligo name         | Sequence                                         |
|--------------------|--------------------------------------------------|
| <i>F32A52.A</i> 5F | 5' TTG CGG CCG CAA TTC ACC AGG GAA TTT ACA CC 3' |
| <i>F32A52.A</i> 3R | 5' CCT CGA GGG TGG TCT TTT CAC ATT CTG G 3'      |
| <i>F32A52.B</i> 5F | 5' TTG CGG CCG CAA CAA CCA CTC ATT TCA CCA GG 3' |
| <i>F32A52.B</i> 3R | 5' CCT CGA GGC TGT AGT TGT TAC TCT TTG TGG 3'    |
| <i>pxn-1</i> 5F    | 5' TTG CGG CCG CAA GGA CTC TGG AAG GTA CAC 3'    |
| <i>pxn-1</i> 3R    | 5' CCT CGA GGA TAC TTG GCA CTT CCA CTC T 3'      |
