# Supplementary material for: The SKPO-1 Peroxidase Functions in the Hypodermis to ProtectCaenorhabditis elegansFrom Bacterial Infection
Source: Oxford University Press journal article supplement (doi:10.1534/genetics.113.160606), 2014-03-13
Supplement: genetics.113.160606-8.pdf [file genetics.113.160606-8.pdf]

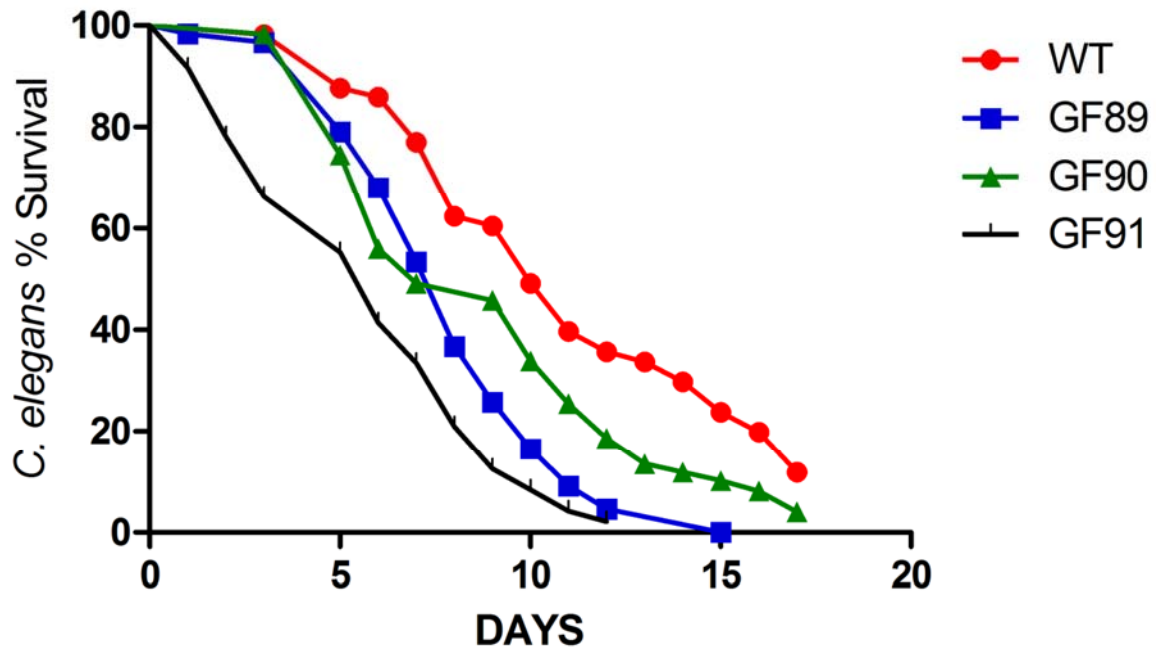

**Figure S1** Survival of *cdc-25.1* RNAi-treated *skpo-1* animal lines on *E. faecalis*. Wild type and *skpo-1* worms were grown on *cdc-25.1* dsRNA expressing *E. coli* HT115 from L1 through L4 larval stage prior to exposure to *E. faecalis* OG1RF. The *skpo-1* worms (GF89, GF90 and GF91) were more susceptible to *E. faecalis* relative to wild type ( $P$ -values < 0.0001, 0.0110, and < 0.0001, respectively).
