# Supplementary material for: The SKPO-1 Peroxidase Functions in the Hypodermis to ProtectCaenorhabditis elegansFrom Bacterial Infection
Source: Oxford University Press journal article supplement (doi:10.1534/genetics.113.160606), 2014-03-13
Supplement: genetics.113.160606-9.pdf [file genetics.113.160606-9.pdf]

**Table S3 Data for Relative Mortality Calculation**

| Figure number | Experiment number          | Strain        | Relative mortality | P-value |
|---------------|----------------------------|---------------|--------------------|---------|
| 1F            | Average of experiments 1-4 | N2            | 1                  | C       |
|               |                            |               | 1                  |         |
|               |                            |               | 1                  |         |
|               |                            |               | <u>1</u>           |         |
|               |                            |               | Avg = 1            |         |
|               |                            | <i>skpo-1</i> | 1.312              | =0.0091 |
|               |                            |               | 1.452              |         |
|               |                            |               | 1.654              |         |
|               |                            |               | 1.253              |         |
|               |                            |               | Avg = 1.418        |         |

C = control
