# Supplementary material for: The SKPO-1 Peroxidase Functions in the Hypodermis to ProtectCaenorhabditis elegansFrom Bacterial Infection
Source: Oxford University Press journal article supplement (doi:10.1534/genetics.113.160606), 2014-03-13
Supplement: genetics.113.160606-10.pdf [file genetics.113.160606-10.pdf]

**Table S1 Median survival and P-values of *E. faecalis* OG1RF killing assays**

| Figure number | Experiment number | Strain, exposure conditions during development | Median survival (days) | P-value |
|---------------|-------------------|------------------------------------------------|------------------------|---------|
| 1A            | 1                 | wild type, VC RNAi                             | 8                      | C       |
|               |                   | wild type, <i>skpo-1</i> RNAi                  | 7                      | =0.0404 |
|               | 2                 | wild type, VC RNAi                             | 7                      | C       |
|               |                   | wild type, <i>skpo-1</i> RNAi                  | 6                      | =0.0331 |
|               | 3                 | <i>eri-1</i> , VC RNAi                         | 8                      | C       |
|               |                   | <i>eri-1</i> , <i>skpo-1</i> RNAi              | 7                      | =0.001  |
|               | 4                 | <i>eri-1</i> , VC RNAi                         | 7                      | C       |
|               |                   | <i>eri-1</i> , <i>skpo-1</i> RNAi              | 5                      | =0.0053 |
|               | 5                 | <i>eri-1</i> , VC RNAi                         | 9                      | C       |
|               |                   | <i>eri-1</i> , <i>skpo-1</i> RNAi              | 8                      | =0.0037 |
| 1C            | 1                 | wild type, <i>cdc-25.1</i> RNAi                | 10                     | C       |
|               |                   | <i>skpo-1</i> , <i>cdc-25.1</i> RNAi           | 6                      | <0.0001 |
|               | 2                 | wild type, <i>cdc-25.1</i> RNAi                | 10                     | C       |
|               |                   | <i>skpo-1</i> , <i>cdc-25.1</i> RNAi           | 8                      | <0.0001 |
|               | 3                 | wild type, <i>cdc-25.1</i> RNAi                | 13                     | C       |
|               |                   | <i>skpo-1</i> , <i>cdc-25.1</i> RNAi           | 8                      | =0.0016 |
|               | 4                 | wild type, <i>cdc-25.1</i> RNAi                | 13                     | C       |
|               |                   | <i>skpo-1</i> , <i>cdc-25.1</i> RNAi           | 8                      | =0.0005 |
|               | 5                 | wild type, <i>cdc-25.1</i> RNAi                | 13                     | C       |
|               |                   | <i>skpo-1</i> , <i>cdc-25.1</i> RNAi           | 7                      | <0.0001 |
| 4A            | 1                 | <i>wrt-2</i> , VC RNAi                         | 5                      | C       |
|               |                   | <i>wrt-2</i> , <i>skpo-1</i> RNAi              | 4                      | =0.0002 |
|               | 2                 | <i>wrt-2</i> , VC RNAi                         | 4                      | C       |
|               |                   | <i>wrt-2</i> , <i>skpo-1</i> RNAi              | 3                      | =0.0176 |
|               | 3                 | <i>wrt-2</i> , VC RNAi                         | 5                      | C       |
|               |                   | <i>wrt-2</i> , <i>skpo-1</i> RNAi              | 4                      | =0.0376 |
|               | 4                 | <i>wrt-2</i> , VC RNAi                         | 4                      | C       |
|               |                   | <i>wrt-2</i> , <i>skpo-1</i> RNAi              | 4                      | =0.0058 |
| 4C            | 1                 | <i>vha-6</i> , VC RNAi                         | 11                     | C       |
|               |                   | <i>vha-6</i> , <i>skpo-1</i> RNAi              | 11                     | =0.6379 |
|               | 2                 | <i>vha-6</i> , VC RNAi                         | 11                     | C       |
|               |                   | <i>vha-6</i> , <i>skpo-1</i> RNAi              | 11                     | =0.735  |
| S1            | 1                 | wild type, OP50                                | 8                      | C       |
|               |                   | <i>skpo-1</i> *, OP50                          | 3                      | <0.0001 |
|               | 2                 | wild type, OP50                                | 8                      | C       |
|               |                   | <i>skpo-1</i> *, OP50                          | 3                      | <0.0001 |

C = control, \*Data only shown for GF89 *skpo-1* strain.
