# Supplementary material for: The SKPO-1 Peroxidase Functions in the Hypodermis to ProtectCaenorhabditis elegansFrom Bacterial Infection
Source: Oxford University Press journal article supplement (doi:10.1534/genetics.113.160606), 2014-03-13
Supplement: genetics.113.160606-12.pdf [file genetics.113.160606-12.pdf]

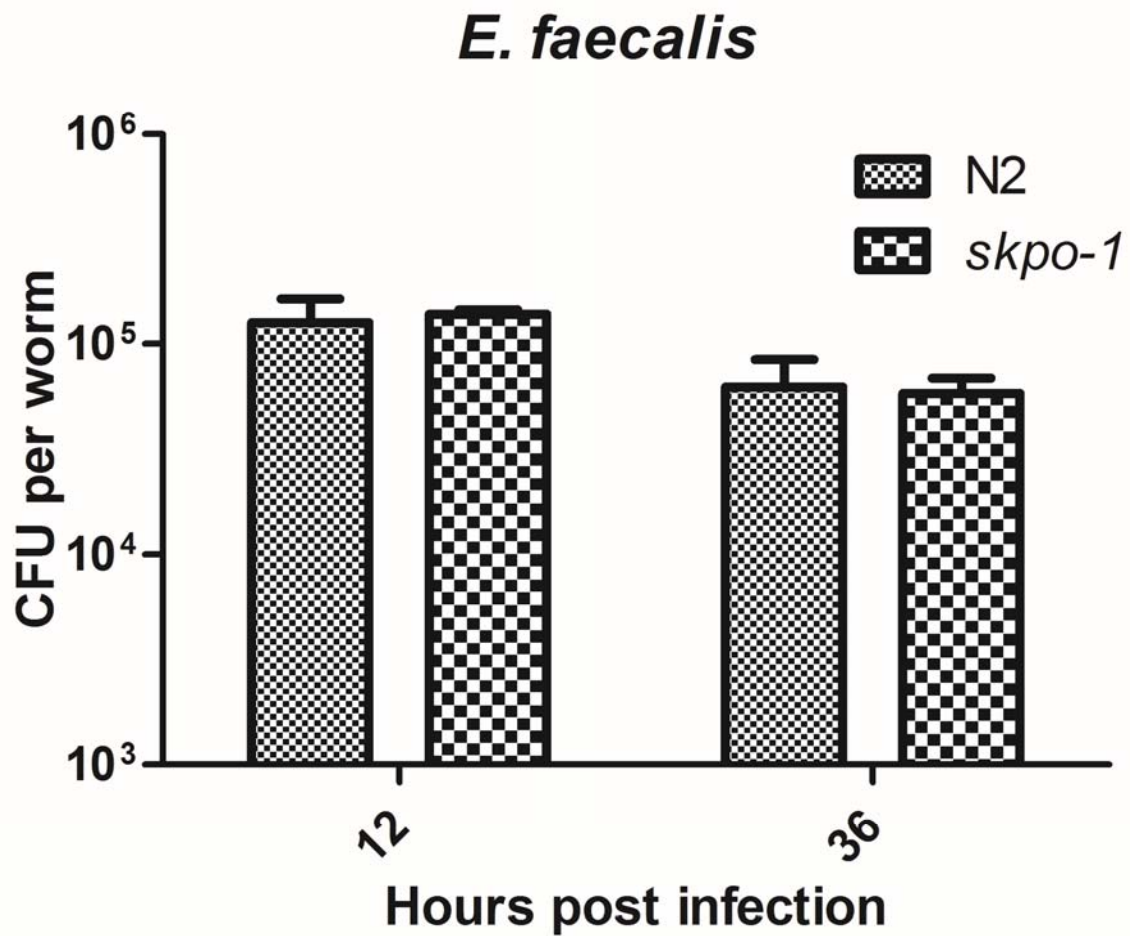

**Figure S4** The *skpo-1* mutant does not have increased intestinal bacterial load during *E. faecalis* infection. L4 wild type and *skpo-1* mutant animals were exposed to *E. faecalis* at 25° C for 12 or 36 hours, respectively. CFU values for both wild type and *skpo-1* animals indicated that there is no significant difference in intestinal colonization by *E. faecalis*. Three biological replicates for each strain were used per time point and the experiment repeated twice—i.e a total n = 60 per strain. *P*-values were 0.3913 and 0.3592 for 12 and 36 hours, respectively.
