# Supplementary material for: The SKPO-1 Peroxidase Functions in the Hypodermis to ProtectCaenorhabditis elegansFrom Bacterial Infection
Source: Oxford University Press journal article supplement (doi:10.1534/genetics.113.160606), 2014-03-13
Supplement: genetics.113.160606-13.pdf [file genetics.113.160606-13.pdf]

**Table S6 qRT-PCR primers for assessing expression of innate immune response genes in response to *E. faecalis***

| Oligo name        | Sequence                            |
|-------------------|-------------------------------------|
| <i>clac-35</i> 5F | 5' AGA TGC TGG ACA GTG GAA AAG 3'   |
| <i>clac-35</i> 3R | 5' GTG CGG AGT ATT GTA GCG TAG 3'   |
| <i>clac-42</i> 5F | 5' GTA ACT CCG TAT TGG CTG GG 3'    |
| <i>clac-42</i> 3R | 5' GTA AAC GCA GCT TCC AAT CTC 3'   |
| <i>clac-60</i> 5F | 5' TGT AAG AGA ACA GTT GGA ACC C 3' |
| <i>clac-60</i> 3R | 5' TAT GTG CAT GGG TAC TGA TCG 3'   |
| <i>clac-71</i> 5F | 5' ACG ACA GGA AGT GAT GTA TTG G 3' |
| <i>clac-71</i> 3R | 5' TTG ACG GAC TTT AGC CAC TG 3'    |
| <i>act-1</i> 5F   | 5' ACC ATG TAC CCA GGA ATT GC 3'    |
| <i>act-1</i> 3R   | 5' TGG AAG GTG GAG AGG GAA G 3'     |
